# Supplementary material for: Mobilome of Apicomplexa Parasites
Source: MDPI journal article supplement (doi:10.3390/genes13050887), 2022-05-16
Supplement: s1 [file s1]

**Table S1.** List of Apicomplexa genomes used in this work.

| Organism                           | Strain               | Genome assembly (Mb) | Version         | Source                       |
|------------------------------------|----------------------|----------------------|-----------------|------------------------------|
| <i>Ascogregarina taiwanensis</i>   | Taoyuan-1            | 6.15                 | GCA_000172235.1 | <a href="#">GenBank</a>      |
| <i>Babesia bigemina</i>            | Bond                 | 13.84                | GCA_000981445.1 | <a href="#">GenBank</a>      |
| <i>Babesia bovis</i>               | T2Bo                 | 8.18                 | GCA_000165395.1 | <a href="#">GenBank</a>      |
| <i>Babesia divergens</i>           | Rouen 1987           | 9.73                 | GCA_001077455.2 | <a href="#">GenBank</a>      |
| <i>Babesia microti</i>             | RI                   | 6.47                 | GCA_000691945.2 | <a href="#">GenBank</a>      |
| <i>Babesia ovata</i>               | Miyake               | 14.45                | GCA_002897235.1 | <a href="#">GenBank</a>      |
| <i>Besnoitia besnoiti</i>          | Bb-Ger1              | 58.85                | GCA_002563875.1 | <a href="#">GenBank</a>      |
| <i>Cryptosporidium andersoni</i>   | isolate: 30847       | 9.09                 | GCA_001865355.1 | <a href="#">GenBank</a>      |
| <i>Cryptosporidium baileyi</i>     | TAMU-09Q1            | 8.49                 | GCA_001593455.1 | <a href="#">GenBank</a>      |
| <i>Cryptosporidium bovis</i>       | isolate: 42482       | 9.11                 | GCA_009768925.1 | <a href="#">GenBank</a>      |
| <i>Cryptosporidium cuniculus</i>   | UKCU2                | 9.18                 | GCA_004337835.1 | <a href="#">GenBank</a>      |
| <i>Cryptosporidium hominis</i>     | UdeA01               | 9.07                 | GCA_002223825.1 | <a href="#">GenBank</a>      |
| <i>Cryptosporidium meleagridis</i> | UKMEL1               | 8.97                 | GCA_001593445.1 | <a href="#">GenBank</a>      |
| <i>Cryptosporidium muris</i>       | RN66                 | 9.25                 | GCA_000006515.1 | <a href="#">GenBank</a>      |
| <i>Cryptosporidium parvum</i>      | Iowa_II              | 9.1                  | GCA_000165345.1 | <a href="#">GenBank</a>      |
| <i>Cryptosporidium ryanae</i>      | isolate: 45019       | 9.06                 | GCA_009792415.1 | <a href="#">GenBank</a>      |
| <i>Cryptosporidium tyzzeri</i>     | isolate: UGA_55      | 9.02                 | GCA_007210665.1 | <a href="#">GenBank</a>      |
| <i>Cryptosporidium ubiquitum</i>   | isolate: 39726       | 8.97                 | GCA_001865345.1 | <a href="#">GenBank</a>      |
| <i>Cryptosporidium viatorum</i>    | isolate: UKVIA1      | 9.26                 | GCA_004337795.1 | <a href="#">GenBank</a>      |
| <i>Cyclospora cayetanensis</i>     | isolate: NF1_C8      | 44.36                | GCA_002999335.1 | <a href="#">GenBank</a>      |
| <i>Cystoisospora suis</i>          | Wien I               | 83.64                | GCA_002600585.1 | <a href="#">GenBank</a>      |
| <i>Cytauxzoon felis</i>            | Winnie               | 9.11                 | release-47      | <a href="#">PiroplasmaDB</a> |
| <i>Eimeria acervulina</i>          | Houghton             | 45.83                | GCA_000499425.1 | <a href="#">GenBank</a>      |
| <i>Eimeria brunetti</i>            | Houghton             | 66.89                | GCA_000499725.1 | <a href="#">GenBank</a>      |
| <i>Eimeria falciformis</i>         | Bayer Haberkorn 1970 | 43.67                | GCA_002271815.1 | <a href="#">GenBank</a>      |
| <i>Eimeria maxima</i>              | Weybridge            | 45.98                | GCA_000499605.1 | <a href="#">GenBank</a>      |
| <i>Eimeria mitis</i>               | Houghton             | 72.24                | GCA_000499745.2 | <a href="#">GenBank</a>      |
| <i>Eimeria necatrix</i>            | Houghton             | 55.01                | GCA_000499385.1 | <a href="#">GenBank</a>      |
| <i>Eimeria nieschulzi</i>          | isolate: Landers     | 62.83                | GCA_000826945.1 | <a href="#">GenBank</a>      |
| <i>Eimeria praecox</i>             | Houghton             | 60.08                | GCA_000499445.1 | <a href="#">GenBank</a>      |
| <i>Eimeria tenella</i>             | Houghton             | 51.86                | GCA_000499545.1 | <a href="#">GenBank</a>      |
| <i>Gregarina niphandrodes</i>      | -                    | 14.01                | GCA_000223845.4 | <a href="#">GenBank</a>      |
| <i>Haemoproteus tartakovskyi</i>   | SISKIN1              | 23.21                | GCA_001625125.1 | <a href="#">GenBank</a>      |
| <i>Hammondia hammondi</i>          | HhCatGer041          | 51.5                 | GCA_000447165.1 | <a href="#">GenBank</a>      |

|                                     |                  |       |                 |                          |
|-------------------------------------|------------------|-------|-----------------|--------------------------|
| <i>Neospora caninum</i>             | Liverpool        | 57.55 | GCA_000208865.2 | <a href="#">GenBank</a>  |
| <i>Plasmodium adleri</i>            | G01              | 22.19 | release-47      | <a href="#">PlasmoDB</a> |
| <i>Plasmodium berghei</i>           | ANKA             | 18.78 | GCA_900002375.2 | <a href="#">GenBank</a>  |
| <i>Plasmodium billcollinsi</i>      | G01              | 23.11 | release-47      | <a href="#">PlasmoDB</a> |
| <i>Plasmodium blacklocki</i>        | G01              | 21.84 | release-47      | <a href="#">PlasmoDB</a> |
| <i>Plasmodium brasilianum</i>       | Bolivian I       | 30.09 | GCA_001885115.2 | <a href="#">GenBank</a>  |
| <i>Plasmodium chabaudi chabaudi</i> | AS               | 18.97 | GCA_900002335.2 | <a href="#">GenBank</a>  |
| <i>Plasmodium coatneyi</i>          | Hackeri          | 27.69 | GCA_001680005.1 | <a href="#">GenBank</a>  |
| <i>Plasmodium cynomolgi</i>         | M                | 30.66 | release-47      | <a href="#">PlasmoDB</a> |
| <i>Plasmodium falciparum</i>        | 3D7              | 23.33 | GCA_000002765.3 | <a href="#">GenBank</a>  |
| <i>Plasmodium fragile</i>           | Nilgiri          | 25.91 | GCA_000956335.1 | <a href="#">GenBank</a>  |
| <i>Plasmodium gaboni</i>            | G01              | 21.38 | release-47      | <a href="#">PlasmoDB</a> |
| <i>Plasmodium gallinaceum</i>       | 8A               | 25.03 | GCA_900005855.1 | <a href="#">GenBank</a>  |
| <i>Plasmodium gonderi</i>           | ATCC 30045       | 33.01 | GCA_002157705.1 | <a href="#">GenBank</a>  |
| <i>Plasmodium inui</i>              | San Antonio 1    | 27.41 | GCA_000524495.1 | <a href="#">GenBank</a>  |
| <i>Plasmodium knowlesi</i>          | Malayan Pk1 (A+) | 24.77 | GCA_002140095.1 | <a href="#">GenBank</a>  |
| <i>Plasmodium malariae</i>          | UG01             | 33.62 | GCA_900090045.1 | <a href="#">GenBank</a>  |
| <i>Plasmodium ovale</i>             | PocGH01          | 33.48 | GCA_900090035.2 | <a href="#">GenBank</a>  |
| <i>Plasmodium praefalciparum</i>    | G01              | 24.96 | release-47      | <a href="#">PlasmoDB</a> |
| <i>Plasmodium reichenowi</i>        | G01              | 24.47 | GCA_900097025.1 | <a href="#">GenBank</a>  |
| <i>Plasmodium relictum</i>          | SGS1             | 22.61 | GCA_900005765.1 | <a href="#">GenBank</a>  |
| <i>Plasmodium vinckei vinckei</i>   | -                | 18.37 | GCA_900681995.1 | <a href="#">GenBank</a>  |
| <i>Plasmodium vivax</i>             | P01              | 29.04 | GCA_900093555.1 | <a href="#">GenBank</a>  |
| <i>Plasmodium yoelii</i>            | 17X              | 23.08 | GCA_900002385.2 | <a href="#">GenBank</a>  |
| <i>Sarcocystis neurona</i>          | SN3              | 124.4 | GCA_000727475.1 | <a href="#">GenBank</a>  |
| <i>Theileria annulata</i>           | Ankara           | 8.36  | GCA_000003225.1 | <a href="#">GenBank</a>  |
| <i>Theileria equi</i>               | WA               | 11.67 | GCA_000342415.1 | <a href="#">GenBank</a>  |
| <i>Theileria orientalis</i>         | Shintoku         | 9.01  | GCA_000740895.1 | <a href="#">GenBank</a>  |
| <i>Theileria parva</i>              | Muguga           | 8.35  | GCA_000165365.1 | <a href="#">GenBank</a>  |
| <i>Toxoplasma gondii</i>            | ME49             | 65.67 | GCA_000006565.2 | <a href="#">GenBank</a>  |
