# Supplementary material for: Mobilome of Apicomplexa Parasites
Source: MDPI journal article supplement (doi:10.3390/genes13050887), 2022-05-16
Supplement: s1 [file s1]

Names in columns are the first four letters of each taxa, e.g. *Atai* is *A. taiwanensis*  
All *Cryptosporidium* genomes are represented by column Cspg since we had no results.

[illegible]

[illegible]

[illegible]

[illegible]

[illegible]
