# Supplementary material for: Mobilome of Apicomplexa Parasites
Source: MDPI journal article supplement (doi:10.3390/genes13050887), 2022-05-16
Supplement: s1 [file s1]

| Table S3. Classification of LTRpred TEs with SwissProt / InterPro |                              |         |        |                |                                  |                                   |          |
|-------------------------------------------------------------------|------------------------------|---------|--------|----------------|----------------------------------|-----------------------------------|----------|
| Contig_coor_LTR                                                   | Contig_coor_int              | Species | Length | Classification | Best Swissprot / InterPro result |                                   |          |
| HG682261.1_360_4695                                               | HG682261.1_618_4430          | Emit    | 4336   | LTR/Gypsy      | sp Q99315 YG31B_YEAST            | Transposon Ty3-G Gag-Pol poly     | 1.39E-50 |
| JRZD01020364.1_8198_12708                                         | JRZD01020364.1_8373_12536    | Enie    | 4511   | LTR/Gypsy      | sp Q99315 YG31B_YEAST            | Transposon Ty3-G Gag-Pol poly     | 1.86E-56 |
| HG710235.1_73348_77934                                            | HG710235.1_73459_77810       | Ebru    | 4587   | LTR/Gypsy      | sp P0CT34 TF21_SCHPO             | Transposon Tf2-1 polyprotein OS   | 1.46E-25 |
| CVMU01000455.1_186_4876                                           | CVMU01000455.1_614_4446      | Prel    | 4691   | LTR/Gypsy      | sp Q7LHG5 YI31B_YEAST            | Transposon Ty3-I Gag-Pol polyp    | 2.32E-21 |
| HG682436.1_7487_12180                                             | HG682436.1_7897_11766        | Emit    | 4694   | LTR/Gypsy      | sp P0CT34 TF21_SCHPO             | Transposon Tf2-1 polyprotein OS   | 1.42E-13 |
| KK211587.1_118_4817                                               | KK211587.1_327_4595          | Gnip    | 4700   | unknown        | PF00910                          | RNA_helicase                      | 5.20E-08 |
| KK211459.1_355622_360423                                          | KK211459.1_355766_360299     | Gnip    | 4802   | LTR/Gypsy      | sp P0CT34 TF21_SCHPO             | Transposon Tf2-1 polyprotein OS   | 7.48E-19 |
| HG722498.1_4969_9927                                              | HG722498.1_5279_9643         | Enec    | 4959   | LTR/Gypsy      | sp Q7LHG5 YI31B_YEAST            | Transposon Ty3-I Gag-Pol polyp    | 5.49E-11 |
| KK211466.1_6705_11865                                             | KK211466.1_6897_11660        | Gnip    | 5161   | LTR/Gypsy      | sp Q7LHG5 YI31B_YEAST            | Transposon Ty3-I Gag-Pol polyp    | 2.20E-19 |
| LN835309.1_1687101_1692447                                        | LN835309.1_1687293_1692258   | Prel    | 5347   | LTR/Gypsy      | sp P0CT36 TF23_SCHPO             | Transposon Tf2-3 polyprotein OS   | 5.96E-36 |
| HG675721.1_23707_29155                                            | HG675721.1_23814_29041       | Eten    | 5449   | LTR/Gypsy      | sp Q7LHG5 YI31B_YEAST            | Transposon Ty3-I Gag-Pol polyp    | 1.01E-20 |
| KK211464.1_184799_190414                                          | KK211464.1_184959_190255     | Gnip    | 5616   | LTR/Gypsy      | sp Q7LHG5 YI31B_YEAST            | Transposon Ty3-I Gag-Pol polyp    | 3.78E-06 |
| CVMV01000039.1_64347_70003                                        | CVMV01000039.1_64805_69539   | Pgal    | 5657   | LTR/Gypsy      | sp P0CT39 TF26_SCHPO             | Transposon Tf2-6 polyprotein OS   | 9.79E-15 |
| HG711106.1_122748_128497                                          | HG711106.1_122943_128305     | Ebru    | 5750   | LTR/Gypsy      | sp P0CT36 TF23_SCHPO             | Transposon Tf2-3 polyprotein OS   | 8.83E-57 |
| KK211477.1_15421_21182                                            | KK211477.1_15538_21066       | Gnip    | 5762   | LTR/Gypsy      | sp Q7LHG5 YI31B_YEAST            | Transposon Ty3-I Gag-Pol polyp    | 2.40E-45 |
| HG681795.1_21412_27201                                            | HG681795.1_21539_27073       | Emit    | 5790   | unknown        | PF17921                          | Integrase zinc binding domain     | 1.20E-11 |
| LSRZ01000044.1_26405_32199                                        | LSRZ01000044.1_26786_31810   | Htar    | 5795   | LTR/Gypsy      | sp P0CT34 TF21_SCHPO             | Transposon Tf2-1 polyprotein OS   | 2.25E-26 |
| HG723319.1_1448_7265                                              | HG723319.1_1592_7138         | Enec    | 5818   | LTR/Gypsy      | sp P0CT42 TF27_SCHPO             | Transposon Tf2-7 polyprotein OS   | 1.56E-30 |
| KK211489.1_33408_39230                                            | KK211489.1_33526_39108       | Gnip    | 5823   | LTR/Gypsy      | sp Q99315 YG31B_YEAST            | Transposon Ty3-G Gag-Pol poly     | 4.23E-19 |
| KK211569.1_225_6122                                               | KK211569.1_381_5976          | Gnip    | 5898   | LTR/Gypsy      | sp Q99315 YG31B_YEAST            | Transposon Ty3-G Gag-Pol poly     | 6.64E-91 |
| HG681867.1_5646_11629                                             | HG681867.1_6021_11249        | Emit    | 5984   | LTR/Gypsy      | sp Q7LHG5 YI31B_YEAST            | Transposon Ty3-I Gag-Pol polyp    | 8.77E-55 |
| CVMV01000032.1_22487_28491                                        | CVMV01000032.1_22594_28387   | Pgal    | 6005   | unknown        | G3DSA:3.30.70.270                | Reverse_transcriptase/Diguanyla   | 4.50E-08 |
| HG674134.1_769630_775652                                          | HG674134.1_769953_775339     | Eten    | 6023   | LTR/Gypsy      | sp P0CT36 TF23_SCHPO             | Transposon Tf2-3 polyprotein OS   | 3.69E-52 |
| HG681136.1_652_6788                                               | HG681136.1_838_6610          | Emit    | 6137   | LTR/Gypsy      | sp Q7LHG5 YI31B_YEAST            | Transposon Ty3-I Gag-Pol polyp    | 6.92E-43 |
| HG674134.1_702355_708498                                          | HG674134.1_702585_708275     | Eten    | 6144   | LTR/Gypsy      | sp Q7LHG5 YI31B_YEAST            | Transposon Ty3-I Gag-Pol polyp    | 6.26E-46 |
| KK211463.1_199838_206000                                          | KK211463.1_199998_205854     | Gnip    | 6163   | LTR/Gypsy      | sp P0CT42 TF27_SCHPO             | Transposon Tf2-7 polyprotein OS   | 1.77E-06 |
| HG681919.1_587_6761                                               | HG681919.1_851_6509          | Emit    | 6175   | LTR/Gypsy      | sp Q7LHG5 YI31B_YEAST            | Transposon Ty3-I Gag-Pol polyp    | 2.10E-44 |
| KK211533.1_4649_10838                                             | KK211533.1_5234_10264        | Gnip    | 6190   | LTR/Gypsy      | sp P0CT36 TF23_SCHPO             | Transposon Tf2-3 polyprotein OS   | 3.69E-07 |
| KK211515.1_23511_29734                                            | KK211515.1_23957_29293       | Gnip    | 6224   | LTR/Gypsy      | sp Q7LHG5 YI31B_YEAST            | Transposon Ty3-I Gag-Pol polyp    | 2.61E-28 |
| NPHX01000623.1_395913_402243                                      | NPHX01000623.1_396037_402110 | Efal    | 6331   | unknown        | G3DSA:3.30.70.270                | Reverse_transcriptase/Diguanyla   | 1.50E-09 |
| HG675732.1_71265_77601                                            | HG675732.1_71461_77401       | Eten    | 6337   | LTR/Gypsy      | sp P10401 POLY_DROME             | Retrovirus-related Pol polyprotei | 5.97E-63 |

|                              |                              |      |      |           |                       |                                   |          |
|------------------------------|------------------------------|------|------|-----------|-----------------------|-----------------------------------|----------|
| HG675688.1_292967_299310     | HG675688.1_293313_298985     | Eten | 6344 | LTR/Gypsy | sp Q7LHG5 YI31B_YEAST | Transposon Ty3-I Gag-Pol polyp    | 1.00E-67 |
| HG675740.1_91006_97371       | HG675740.1_91422_96954       | Eten | 6366 | LTR/Gypsy | sp Q7LHG5 YI31B_YEAST | Transposon Ty3-I Gag-Pol polyp    | 7.34E-64 |
| KK211458.1_145402_151828     | KK211458.1_146232_150987     | Gnip | 6427 | unknown   | G3DSA:3.30.70.270     | Reverse_transcriptase/Diguanyla   | 1.80E-13 |
| HG693258.1_401_6894          | HG693258.1_808_6495          | Epra | 6494 | LTR/Gypsy | sp Q7LHG5 YI31B_YEAST | Transposon Ty3-I Gag-Pol polyp    | 2.24E-45 |
| HG675710.1_21574_28097       | HG675710.1_22001_27691       | Eten | 6524 | LTR/Gypsy | sp Q99315 YG31B_YEAST | Transposon Ty3-G Gag-Pol poly     | 3.28E-50 |
| KK211481.1_3812_10436        | KK211481.1_4052_10197        | Gnip | 6625 | LTR/Gypsy | sp P0CT36 TF23_SCHPO  | Transposon Tf2-3 polyprotein O    | 2.00E-18 |
| HG710647.1_3935_10574        | HG710647.1_4046_10439        | Ebru | 6640 | LTR/Gypsy | sp P0CT36 TF23_SCHPO  | Transposon Tf2-3 polyprotein O    | 2.40E-67 |
| KK211560.1_10_6707           | KK211560.1_434_6282          | Gnip | 6698 | LTR/Gypsy | sp Q99315 YG31B_YEAST | Transposon Ty3-G Gag-Pol poly     | 1.44E-08 |
| HG710836.1_102985_109698     | HG710836.1_103222_109459     | Ebru | 6714 | LTR/Gypsy | sp Q99315 YG31B_YEAST | Transposon Ty3-G Gag-Pol poly     | 2.57E-45 |
| HG695846.1_2484_9213         | HG695846.1_2858_8839         | Epra | 6730 | LTR/Gypsy | sp Q9UR07 TF211_SCHPO | Transposon Tf2-11 polyprotein C   | 1.01E-38 |
| HG711045.1_1381_8118         | HG711045.1_1538_7957         | Ebru | 6738 | LTR/Gypsy | sp P0CT36 TF23_SCHPO  | Transposon Tf2-3 polyprotein O    | 8.44E-60 |
| HG674448.1_100958_107713     | HG674448.1_101219_107463     | Eten | 6756 | LTR/Gypsy | sp Q7LHG5 YI31B_YEAST | Transposon Ty3-I Gag-Pol polyp    | 4.81E-55 |
| HG675753.1_105769_112558     | HG675753.1_106038_112293     | Eten | 6790 | LTR/Gypsy | sp Q7LHG5 YI31B_YEAST | Transposon Ty3-I Gag-Pol polyp    | 8.71E-42 |
| MIGC01003977.1_1981_8772     | MIGC01003977.1_2276_8479     | Csui | 6792 | LTR/Gypsy | sp Q99315 YG31B_YEAST | Transposon Ty3-G Gag-Pol poly     | 5.01E-83 |
| HG722320.1_4105_10977        | HG722320.1_4352_10724        | Enec | 6873 | LTR/Gypsy | sp Q99315 YG31B_YEAST | Transposon Ty3-G Gag-Pol poly     | 1.44E-44 |
| CVMV01000004.1_338491_345403 | CVMV01000004.1_338612_345285 | Pgal | 6913 | LTR/Gypsy | sp Q9UR07 TF211_SCHPO | Transposon Tf2-11 polyprotein C   | 2.22E-20 |
| HG725993.1_56353_63284       | HG725993.1_56961_62679       | Enec | 6932 | LTR/Gypsy | sp P10401 POLY_DROME  | Retrovirus-related Pol polyprotei | 1.08E-61 |
| HG713571.1_822_7756          | HG713571.1_1230_7344         | Ebru | 6935 | LTR/Gypsy | sp P0CT42 TF27_SCHPO  | Transposon Tf2-7 polyprotein O    | 2.72E-56 |
| HG673788.1_70160_77206       | HG673788.1_70558_76795       | Eten | 7047 | LTR/Gypsy | sp P0CT36 TF23_SCHPO  | Transposon Tf2-3 polyprotein O    | 1.15E-66 |
| HG673821.1_293544_300608     | HG673821.1_293950_300201     | Eten | 7065 | LTR/Gypsy | sp Q99315 YG31B_YEAST | Transposon Ty3-G Gag-Pol poly     | 1.79E-68 |
| HG713059.1_81286_88393       | HG713059.1_81693_87986       | Ebru | 7108 | LTR/Gypsy | sp Q7LHG5 YI31B_YEAST | Transposon Ty3-I Gag-Pol polyp    | 6.22E-40 |
| HG692652.1_1924_9040         | HG692652.1_2304_8664         | Epra | 7117 | LTR/Gypsy | sp Q99315 YG31B_YEAST | Transposon Ty3-G Gag-Pol poly     | 7.59E-50 |
| HG681479.1_813_7938          | HG681479.1_1059_7701         | Emit | 7126 | LTR/Gypsy | sp Q7LHG5 YI31B_YEAST | Transposon Ty3-I Gag-Pol polyp    | 2.91E-18 |
| HG684190.1_7128_14290        | HG684190.1_7429_13993        | Emit | 7163 | LTR/Gypsy | sp Q7LHG5 YI31B_YEAST | Transposon Ty3-I Gag-Pol polyp    | 4.52E-66 |
| HG684929.1_3496_10674        | HG684929.1_3836_10333        | Emit | 7179 | LTR/Gypsy | sp Q7LHG5 YI31B_YEAST | Transposon Ty3-I Gag-Pol polyp    | 4.02E-62 |
| HG683691.1_4451_11685        | HG683691.1_4862_11273        | Emit | 7235 | LTR/Gypsy | sp Q7LHG5 YI31B_YEAST | Transposon Ty3-I Gag-Pol polyp    | 1.75E-66 |
| MIGC01002064.1_13_7295       | MIGC01002064.1_141_7174      | Csui | 7283 | LTR/Gypsy | sp Q7LHG5 YI31B_YEAST | Transposon Ty3-I Gag-Pol polyp    | 1.94E-33 |
| HG674448.1_264037_271338     | HG674448.1_264480_270891     | Eten | 7302 | LTR/Gypsy | sp Q7LHG5 YI31B_YEAST | Transposon Ty3-I Gag-Pol polyp    | 3.48E-37 |
| CVMU01000349.1_132_7529      | CVMU01000349.1_563_7114      | Prel | 7398 | LTR/Gypsy | sp Q9UR07 TF211_SCHPO | Transposon Tf2-11 polyprotein C   | 6.94E-18 |
| HG675655.1_91584_99077       | HG675655.1_91863_98814       | Eten | 7494 | LTR/Gypsy | sp Q7LHG5 YI31B_YEAST | Transposon Ty3-I Gag-Pol polyp    | 1.58E-43 |
| HG690086.1_28063_35653       | HG690086.1_28314_35434       | Epra | 7591 | LTR/Gypsy | sp P0CT36 TF23_SCHPO  | Transposon Tf2-3 polyprotein O    | 1.52E-51 |
| HG712368.1_15660_23275       | HG712368.1_16038_22891       | Ebru | 7616 | LTR/Gypsy | sp Q7LHG5 YI31B_YEAST | Transposon Ty3-I Gag-Pol polyp    | 4.76E-42 |
| HG696922.1_13941_21575       | HG696922.1_14383_21124       | Epra | 7635 | LTR/Gypsy | sp P0CT36 TF23_SCHPO  | Transposon Tf2-3 polyprotein O    | 9.53E-57 |

|                              |                              |      |       |           |                       |                                   |          |
|------------------------------|------------------------------|------|-------|-----------|-----------------------|-----------------------------------|----------|
| HG711106.1_82247_89939       | HG711106.1_82658_89532       | Ebru | 7693  | LTR/Gypsy | sp Q7LHG5 YI31B_YEAST | Transposon Ty3-I Gag-Pol polyp    | 3.41E-30 |
| HG710305.1_8156_15908        | HG710305.1_8563_15500        | Ebru | 7753  | LTR/Gypsy | sp P0CT36 TF23_SCHPO  | Transposon Tf2-3 polyprotein OS   | 1.33E-33 |
| HG725809.1_9674_17493        | HG725809.1_9809_17368        | Enec | 7820  | LTR/Gypsy | sp Q7LHG5 YI31B_YEAST | Transposon Ty3-I Gag-Pol polyp    | 3.59E-20 |
| KK211478.1_167358_175250     | KK211478.1_167812_174823     | Gnip | 7893  | unknown   | PF17921               | Integrase zinc binding domain     | 2.40E-10 |
| HG673774.1_169918_177897     | HG673774.1_170131_177680     | Eten | 7980  | unknown   | SSF57756              | Retrovirus_zinc_finger-like_dom   | 2.54E-05 |
| HG710913.1_5041_13061        | HG710913.1_5455_12653        | Ebru | 8021  | LTR/Gypsy | sp Q7LHG5 YI31B_YEAST | Transposon Ty3-I Gag-Pol polyp    | 1.70E-57 |
| JRZD01019964.1_15170_23207   | JRZD01019964.1_15472_22901   | Enie | 8038  | LTR/Gypsy | sp Q7LHG5 YI31B_YEAST | Transposon Ty3-I Gag-Pol polyp    | 8.75E-35 |
| HG719210.1_6353_14396        | HG719210.1_6505_14249        | Emax | 8044  | LTR/Gypsy | sp Q7LHG5 YI31B_YEAST | Transposon Ty3-I Gag-Pol polyp    | 3.51E-20 |
| HG719159.1_29417_37473       | HG719159.1_30248_36647       | Emax | 8057  | LTR/Gypsy | sp Q99315 YG31B_YEAST | Transposon Ty3-G Gag-Pol poly     | 6.64E-66 |
| HG687582.1_865_9203          | HG687582.1_1285_8781         | Emit | 8339  | LTR/Gypsy | sp Q7LHG5 YI31B_YEAST | Transposon Ty3-I Gag-Pol polyp    | 2.54E-42 |
| HG723282.1_170019_178368     | HG723282.1_170439_177948     | Enec | 8350  | LTR/Gypsy | sp P0CT36 TF23_SCHPO  | Transposon Tf2-3 polyprotein OS   | 1.54E-36 |
| HG723041.1_37971_46322       | HG723041.1_38181_46112       | Enec | 8352  | LTR/Gypsy | sp Q7LHG5 YI31B_YEAST | Transposon Ty3-I Gag-Pol polyp    | 1.87E-46 |
| CVMU01000313.1_968_9323      | CVMU01000313.1_1070_9204     | Prel | 8356  | unknown   | G3DSA:3.30.420.10     | Ribonuclease H superfamily        | 1.80E-15 |
| KK211530.1_4533_13261        | KK211530.1_5035_12765        | Gnip | 8729  | unknown   | PF17917               | RNase_H-like_domain_found_in      | 2.30E-14 |
| NPHX01000679.1_12963_22350   | NPHX01000679.1_13132_22177   | Efal | 9388  | LTR/Gypsy | sp Q7LHG5 YI31B_YEAST | Transposon Ty3-I Gag-Pol polyp    | 3.57E-07 |
| PVNT01000011.1_254069_263521 | PVNT01000011.1_255574_262003 | Ccay | 9453  | unknown   | G3DSA:3.30.70.270     | Reverse_transcriptase/Diguanyla   | 2.80E-09 |
| HG722610.1_45323_55217       | HG722610.1_45508_55019       | Enec | 9895  | LTR/Gypsy | sp Q7LHG5 YI31B_YEAST | Transposon Ty3-I Gag-Pol polyp    | 2.00E-47 |
| HG683798.1_11218_21221       | HG683798.1_11364_21066       | Emit | 10004 | LTR/Gypsy | sp Q7LHG5 YI31B_YEAST | Transposon Ty3-I Gag-Pol polyp    | 2.40E-45 |
| HG691322.1_5605_16076        | HG691322.1_5776_15918        | Epra | 10472 | LTR/Gypsy | sp Q7LHG5 YI31B_YEAST | Transposon Ty3-I Gag-Pol polyp    | 1.96E-47 |
| JRZD01020054.1_262_12654     | JRZD01020054.1_448_12459     | Enie | 12393 | LTR/Gypsy | sp Q7LHG5 YI31B_YEAST | Transposon Ty3-I Gag-Pol polyp    | 2.17E-84 |
| MIGC01004125.1_358_12922     | MIGC01004125.1_488_12804     | Csui | 12565 | LTR/Gypsy | sp Q7LHG5 YI31B_YEAST | Transposon Ty3-I Gag-Pol polyp    | 5.31E-57 |
| CVMU01000304.1_11_12577      | CVMU01000304.1_266_12308     | Prel | 12567 | LTR/Gypsy | sp Q9UR07 TF211_SCHPO | Transposon Tf2-11 polyprotein C   | 4.11E-07 |
| PVNT01000014.1_264697_277627 | PVNT01000014.1_265511_276832 | Ccay | 12931 | LTR/Gypsy | sp Q99315 YG31B_YEAST | Transposon Ty3-G Gag-Pol poly     | 6.61E-08 |
| PVNT01000001.1_682830_695808 | PVNT01000001.1_683557_695078 | Ccay | 12979 | unknown   | sp P04323 POL3_DROME  | Retrovirus-related Pol polyprotei | 7.93E-07 |
| CVMU01000039.1_1389_15611    | CVMU01000039.1_1527_15469    | Prel | 14223 | LTR/Gypsy | sp P0CT40 TF29_SCHPO  | Transposon Tf2-9 polyprotein OS   | 6.37E-08 |
| HG694242.1_1573_16310        | HG694242.1_1680_16206        | Epra | 14738 | LTR/Gypsy | sp P10401 POLY_DROME  | Retrovirus-related Pol polyprotei | 2.73E-08 |
| HG692621.1_2039_16944        | HG692621.1_2180_16803        | Epra | 14906 | LTR/Gypsy | sp P20825 POL2_DROME  | Retrovirus-related Pol polyprotei | 7.52E-52 |
| HG725887.1_92420_110019      | HG725887.1_92677_109763      | Enec | 17600 | LTR/Gypsy | sp Q8I7P9 POL5_DROME  | Retrovirus-related Pol polyprotei | 1.55E-10 |
| CVMV01000033.1_1087_20130    | CVMV01000033.1_3844_17366    | Pgal | 19044 | unknown   | sp Q6XKE6 POLG_PVCV2  | Genome polyprotein OS=Petunia     | 5.49E-09 |
| HG712979.1_2733_21836        | HG712979.1_2888_21687        | Ebru | 19104 | LTR/Gypsy | sp P04323 POL3_DROME  | Retrovirus-related Pol polyprotei | 8.39E-54 |
| KK211493.1_40397_59666       | KK211493.1_40638_59426       | Gnip | 19270 | LTR/Gypsy | sp Q7LHG5 YI31B_YEAST | Transposon Ty3-I Gag-Pol polyp    | 1.86E-18 |
| KK211463.1_94483_114767      | KK211463.1_94638_114632      | Gnip | 20285 | unknown   | sp P04323 POL3_DROME  | Retrovirus-related Pol polyprotei | 4.49E-12 |
