# Supplementary material for: Mobilome of Apicomplexa Parasites
Source: MDPI journal article supplement (doi:10.3390/genes13050887), 2022-05-16
Supplement: s1 [file s1]

**Table S2.** Classification of TE models, according to TE class, Dfam, SwissProt and InterPro

| ID       | Length | General classif. | TE class | Dfam        |                               |          | SwissProt |                                         |          | InterPro          |                                  |          |
|----------|--------|------------------|----------|-------------|-------------------------------|----------|-----------|-----------------------------------------|----------|-------------------|----------------------------------|----------|
| Atai_2   | 3418   | LTR/Gypsy        | LTR      | DF0001544.2 | BLASTOPIA_I/Gypsy             | 1.30E-32 | Q8I7P9    | Retrovirus-related Pol polyprotein from | 3.56E-56 | PTHR24559         | TRANSPOSON TY3-I GAG-PO          | 6.40E-74 |
| Atai_3   | 2691   | LTR/Gypsy        | LTR      | DF0001544.3 | BLASTOPIA_I/Gypsy             | 1.90E-43 | Q8I7P9    | Retrovirus-related Pol polyprotein from | 5.97E-67 | PTHR24559         | TRANSPOSON TY3-I GAG-PO          | 4.90E-87 |
| Atai_4   | 1990   | LTR/Gypsy        | unclear  | DF0004565.1 | Halyomorpha_halys-1_family-27 | 7.50E-15 | P04323    | Retrovirus-related Pol polyprotein from | 2.20E-11 | cd09274           | RNase_HL_RT_Ty3                  | 7.98E-27 |
| Atai_6   | 1480   | Unknown          | LINE     | -           | -                             | -        | -         | -                                       | -        | cd00303           | retropepsin_like                 | 1.52E-09 |
| Bdiv_22  | 735    | Unknown          | LINE     | -           | -                             | -        | -         | -                                       | -        | PTHR35450         | REVERSE TRANSCRIPTASE [          | 2.60E-12 |
| Bova_19  | 2078   | Unknown          | LINE     | -           | -                             | -        | -         | -                                       | -        | PF00078           | Reverse transcriptase (RNA-de    | 1.90E-26 |
| Ccay_21  | 1535   | Unknown          | unclear  | -           | -                             | -        | -         | -                                       | -        | cd00303           | retropepsin_like                 | 2.03E-18 |
| Ccay_36  | 1023   | LTR/Gypsy        | unclear  | DF0004348.1 | Halyomorpha_halys-1_family-23 | 7.50E-15 | Q7LHG5    | Transposon Ty3-I Gag-Pol polyprotein    | 4.76E-18 | cd01647           | RT_LTR                           | 1.08E-34 |
| Ccay_77  | 427    | LTR/Gypsy        | LINE     | DF0002684.1 | Gypsy107-I_Dr                 | 2.40E-16 | P04323    | Retrovirus-related Pol polyprotein from | 7.83E-08 | G3DSA:3.30.70.270 | Reverse transcriptase/Diguanyl   | 7.80E-11 |
| Ccay_87  | 346    | Unknown          | LINE     | -           | -                             | -        | -         | -                                       | -        | PF03732           | Retrotransposon gag protein      | 8.40E-08 |
| Ccay_93  | 294    | LTR/Gypsy        | DNA      | -           | -                             | -        | Q99315    | Transposon Ty3-G Gag-Pol polyprotein    | 3.38E-10 | PF17921           | Integrase zinc binding domain    | 1.50E-19 |
| Csui_108 | 553    | LTR/Gypsy        | LTR      | DF0002844.1 | Gypsy-30-I_DR                 | 6.60E-26 | Q7LHG5    | Transposon Ty3-I Gag-Pol polyprotein    | 4.41E-30 | G3DSA:3.30.70.270 | Reverse transcriptase/Diguanyl   | 7.80E-48 |
| Csui_11  | 1904   | Unknown          | Retro    | -           | -                             | -        | -         | -                                       | -        | PF03732           | Retrotransposon gag protein      | 7.30E-12 |
| Csui_125 | 478    | Unknown          | LINE     | -           | -                             | -        | -         | -                                       | -        | SSF57756          | Retrovirus zinc finger-like doma | 4.71E-05 |
| Csui_20  | 1483   | Unknown          | LTR      | -           | -                             | -        | -         | -                                       | -        | cd00303           | retropepsin_like                 | 6.50E-07 |
| Csui_3   | 3775   | Unknown          | LTR      | -           | -                             | -        | -         | -                                       | -        | cd00303           | retropepsin_like                 | 4.43E-10 |
| Csui_35  | 1206   | LTR/Gypsy        | Retro    | DF0002541.1 | Gypsy72-I_DR                  | 1.00E-23 | Q99315    | Transposon Ty3-G Gag-Pol polyprotein    | 1.61E-51 | PTHR24559         | TRANSPOSON TY3-I GAG-PO          | 5.90E-89 |
| Csui_42  | 1099   | Unknown          | LTR      | -           | -                             | -        | -         | -                                       | -        | PTHR34482         | DNA DAMAGE-INDUCIBLE PR          | 2.90E-12 |
| Csui_44  | 1083   | Unknown          | LTR      | -           | -                             | -        | -         | -                                       | -        | SSF50630          | Acid proteases                   | 3.02E-05 |
| Csui_48  | 1054   | Unknown          | LTR      | -           | -                             | -        | -         | -                                       | -        | cd18978           | CD_DDE_transposase_like          | 5.89E-05 |
| Csui_84  | 695    | Unknown          | LTR      | -           | -                             | -        | -         | -                                       | -        | cd00303           | retropepsin_like                 | 3.81E-16 |
| Csui_85  | 690    | Unknown          | Retro    | -           | -                             | -        | -         | -                                       | -        | PF17921           | Integrase zinc binding domain    | 5.80E-11 |
| Csui_95  | 640    | LTR/Gypsy        | Retro    | DF0002669.2 | Gypsy-173_DR-I                | 1.30E-07 | -         | -                                       | -        | -                 | -                                | -        |
| Eace_10  | 1749   | LTR/Gypsy        | Retro    | DF0003190.1 | Gypsy-194_DR-I                | 1.10E-28 | Q7LHG5    | Transposon Ty3-I Gag-Pol polyprotein    | 2.77E-46 | PTHR24559         | TRANSPOSON TY3-I GAG-PO          | 1.10E-79 |
| Eace_102 | 451    | Unknown          | LTR      | -           | -                             | -        | -         | -                                       | -        | G3DSA:4.10.60.10  | Acid Proteases                   | 4.40E-12 |
| Eace_38  | 1057   | LTR/Gypsy        | LTR      | DF0002669.2 | Gypsy-173_DR-I                | 1.70E-12 | Q99315    | Transposon Ty3-G Gag-Pol polyprotein    | 1.76E-13 | PTHR24559         | TRANSPOSON TY3-I GAG-PO          | 5.50E-25 |
| Eace_42  | 1034   | LTR/Gypsy        | unclear  | DF0002513.2 | Gypsy-168-I_DR                | 5.40E-26 | P20825    | Retrovirus-related Pol polyprotein from | 4.44E-40 | cd01647           | RT_LTR                           | 9.83E-62 |
| Eace_56  | 814    | Unknown          | unclear  | -           | -                             | -        | -         | -                                       | -        | cd00303           | retropepsin_like                 | 1.46E-14 |
| Eace_64  | 707    | LTR/Gypsy        | LINE     | DF0002062.1 | RLTR20C2_MM/Gypsy             | 1.40E-08 | -         | -                                       | -        | -                 | -                                | -        |
| Eace_70  | 633    | LTR/Gypsy        | LINE     | DF0003150.2 | Gypsy172-I_Dr                 | 6.40E-25 | P20825    | Retrovirus-related Pol polyprotein from | 9.12E-31 | cd01647           | RT_LTR                           | 7.68E-38 |
| Ebru_16  | 2009   | Unknown          | LTR      | -           | -                             | -        | -         | -                                       | -        | G3DSA:4.10.60.10  | Acid Proteases                   | 1.30E-12 |
| Ebru_31  | 1362   | Unknown          | LINE     | -           | -                             | -        | -         | -                                       | -        | cd00303           | retropepsin_like                 | 6.77E-11 |
| Ebru_34  | 1269   | Unknown          | LINE     | -           | -                             | -        | -         | -                                       | -        | cd00303           | retropepsin_like                 | 6.26E-11 |
| Ebru_57  | 954    | Unknown          | LTR      | -           | -                             | -        | -         | -                                       | -        | PTHR46148         | CHROMO DOMAIN-CONTAINI           | 1.40E-17 |
| Ebru_7   | 3254   | LTR/Gypsy        | Retro    | DF0001532.2 | ACCORD_I/Gypsy                | 1.20E-23 | P20825    | Retrovirus-related Pol polyprotein from | 1.02E-41 | G3DSA:3.30.70.270 | Reverse transcriptase/Diguanyl   | 3.80E-62 |
| Efal_129 | 570    | LTR/Gypsy        | LINE     | DF0003150.2 | Gypsy172-I_Dr                 | 1.60E-17 | Q7LHG5    | Transposon Ty3-I Gag-Pol polyprotein    | 1.32E-38 | PTHR24559         | TRANSPOSON TY3-I GAG-PO          | 3.00E-52 |
| Efal_132 | 549    | LTR/Gypsy        | LINE     | DF0003150.2 | Gypsy172-I_Dr                 | 4.50E-16 | Q7LHG5    | Transposon Ty3-I Gag-Pol polyprotein    | 4.60E-20 | G3DSA:3.30.420.10 | Ribonuclease H superfamily       | 1.00E-37 |
| Efal_145 | 506    | Unknown          | LTR      | -           | -                             | -        | -         | -                                       | -        | PF17921           | Integrase zinc binding domain    | 3.50E-10 |
| Efal_153 | 489    | LTR/Gypsy        | DNA      | DF0001532.2 | ACCORD_I/Gypsy                | 6.90E-27 | Q7LHG5    | Transposon Ty3-I Gag-Pol polyprotein    | 8.99E-39 | cd01647           | RT_LTR                           | 1.78E-58 |
| Efal_162 | 461    | Unknown          | LTR      | -           | -                             | -        | -         | -                                       | -        | cd00303           | retropepsin_like                 | 3.44E-16 |
| Efal_172 | 444    | LTR/Gypsy        | DNA      | DF0004438.1 | Halyomorpha_halys-1_family-19 | 1.10E-29 | Q7LHG5    | Transposon Ty3-I Gag-Pol polyprotein    | 1.20E-37 | cd01647           | RT_LTR                           | 6.82E-72 |
| Efal_180 | 428    | Unknown          | LINE     | -           | -                             | -        | -         | -                                       | -        | PF08284           | Retroviral aspartyl protease     | 2.40E-10 |
| Efal_183 | 420    | LTR/Gypsy        | LINE     | DF0004565.1 | Halyomorpha_halys-1_family-27 | 5.60E-08 | P20825    | Retrovirus-related Pol polyprotein from | 7.08E-12 | cd09274           | RNase_HL_RT_Ty3                  | 2.71E-34 |
| Efal_193 | 398    | PF00385          | LINE     | -           | -                             | -        | Q04832    | DNA-binding protein HEXBP               | 9.85E-07 | SSF57756          | Retrovirus zinc finger-like doma | 1.32E-10 |
| Efal_205 | 370    | LTR/Gypsy        | Retro    | DF0004565.1 | Halyomorpha_halys-1_family-27 | 1.20E-10 | P10401    | Retrovirus-related Pol polyprotein from | 7.43E-21 | cd09274           | RNase_HL_RT_Ty3                  | 9.16E-49 |
| Efal_209 | 362    | LTR/Gypsy        | DNA      | DF0004973.1 | Halyomorpha_halys-1_family-63 | 4.50E-08 | P31792    | Pol polyprotein (Fragment)              | 3.83E-13 | G3DSA:3.30.70.270 | Reverse transcriptase/Diguanyl   | 4.10E-18 |

|          |      |           |         |             |                               |          |        |                                         |          |                   |                                   |           |
|----------|------|-----------|---------|-------------|-------------------------------|----------|--------|-----------------------------------------|----------|-------------------|-----------------------------------|-----------|
| Efal_210 | 358  | LTR/Gypsy | Retro   | -           | -                             | -        | P0CT43 | Transposon Tf2-8 polypeptide            | 2.11E-09 | PF17921           | Integrase zinc binding domain     | 1.10E-16  |
| Efal_242 | 309  | LTR/Gypsy | LTR     | DF0001608.2 | GTWIN_I/Gypsy                 | 1.70E-10 | P04323 | Retrovirus-related Pol polypeptide from | 1.11E-10 | PTHR24559         | TRANSPOSON TY3-I GAG-PO           | 3.10E-19  |
| Efal_247 | 297  | LTR/Gypsy | LINE    | DF0002733.1 | Gypsy89-I_DR                  | 4.80E-09 | Q7LHG5 | Transposon Ty3-I Gag-Pol polypeptide    | 1.58E-07 | PTHR24559         | TRANSPOSON TY3-I GAG-PO           | 6.20E-12  |
| Efal_275 | 251  | LTR/Gypsy | LINE    | -           | -                             | -        | P31792 | Pol polypeptide (Fragment)              | 7.54E-12 | PF17919           | RNase H-like domain found in r    | 2.30E-18  |
| Efal_289 | 232  | Unknown   | nonLTR  | -           | -                             | -        | -      | -                                       | -        | SSF57756          | Retrovirus zinc finger-like doma  | 7.63E-07  |
| Efal_318 | 178  | Unknown   | Retro   | -           | -                             | -        | -      | -                                       | -        | G3DSA:3.30.70.270 | Reverse transcriptase/Diguanyl    | 1.10E-08  |
| Efal_89  | 775  | LTR/Gypsy | LINE    | -           | -                             | -        | -      | -                                       | -        | SSF57756          | Retrovirus zinc finger-like doma  | 2.09E-08  |
| Efal_90  | 758  | Unknown   | unclear | -           | -                             | -        | -      | -                                       | -        | cd00303           | retropepsin_like                  | 1.17E-12  |
| Emax_105 | 601  | LTR/Gypsy | LINE    | DF0003595.2 | Gypsy-210_DR-I                | 3.30E-11 | P0CT43 | Transposon Tf2-8 polypeptide            | 4.27E-32 | G3DSA:3.30.70.270 | Reverse transcriptase/Diguanyl    | 8.40E-53  |
| Emax_133 | 549  | Unknown   | LTR     | -           | -                             | -        | -      | -                                       | -        | G3DSA:2.40.70.10  | Acid Proteases 1                  | 4.20E-05  |
| Emax_163 | 476  | Unknown   | Retro   | -           | -                             | -        | -      | -                                       | -        | cd00303           | retropepsin_like                  | 1.71E-12  |
| Emax_299 | 266  | Unknown   | Retro   | -           | -                             | -        | -      | -                                       | -        | -                 | -                                 | -         |
| Emax_48  | 962  | LTR/Gypsy | Retro   | DF0002541.1 | Gypsy72-I_DR                  | 1.80E-19 | Q99315 | Transposon Ty3-G Gag-Pol polypeptide    | 7.08E-26 | G3DSA:3.30.420.10 | Ribonuclease H superfamily        | 1.00E-18  |
| Emax_59  | 854  | LTR/Gypsy | DNA     | -           | -                             | -        | Q7LHG5 | Transposon Ty3-I Gag-Pol polypeptide    | 7.32E-07 | G3DSA:3.30.420.10 | Ribonuclease H superfamily        | 9.70E-14  |
| Emit_102 | 814  | LTR/Gypsy | DNA     | DF0002684.1 | Gypsy107-I_Dr                 | 2.70E-29 | Q7LHG5 | Transposon Ty3-I Gag-Pol polypeptide    | 9.45E-39 | cd01647           | RT_LTR                            | 6.83E-78  |
| Emit_148 | 670  | Unknown   | LTR     | -           | -                             | -        | -      | -                                       | -        | G3DSA:4.10.60.10  | Acid Proteases                    | 5.70E-07  |
| Emit_20  | 1781 | LTR/Gypsy | LINE    | -           | -                             | -        | Q99315 | Transposon Ty3-G Gag-Pol polypeptide    | 6.43E-77 | PTHR24559         | TRANSPOSON TY3-I GAG-PO           | 3.00E-107 |
| Emit_22  | 1658 | Unknown   | LINE    | -           | -                             | -        | -      | -                                       | -        | cd00303           | retropepsin_like                  | 1.66E-17  |
| Emit_31  | 1453 | LTR/Gypsy | LINE    | DF0002407.1 | Gypsy135-I_DR                 | 1.50E-21 | Q99315 | Transposon Ty3-G Gag-Pol polypeptide    | 2.52E-48 | PTHR24559         | TRANSPOSON TY3-I GAG-PO           | 2.00E-77  |
| Emit_34  | 1404 | Unknown   | LINE    | -           | -                             | -        | -      | -                                       | -        | cd18977           | CD_POL_like                       | 5.82E-04  |
| Emit_343 | 394  | Unknown   | LTR     | -           | -                             | -        | -      | -                                       | -        | G3DSA:4.10.60.10  | Acid Proteases                    | 9.70E-11  |
| Emit_8   | 3115 | LTR/Gypsy | LTR     | DF0002669.2 | Gypsy-173_DR-I                | 3.00E-20 | P04323 | Retrovirus-related Pol polypeptide from | 4.76E-83 | PTHR24559         | TRANSPOSON TY3-I GAG-PO           | 9.80E-84  |
| Emit_82  | 898  | LTR/Gypsy | LTR     | DF0002684.1 | Gypsy107-I_Dr                 | 2.80E-41 | P04323 | Retrovirus-related Pol polypeptide from | 3.19E-62 | cd01647           | RT_LTR                            | 5.91E-78  |
| Enie_1   | 6283 | LTR/Gypsy | LINE    | -           | -                             | -        | Q817P9 | Retrovirus-related Pol polypeptide from | 5.27E-48 | cd01647           | RT_LTR                            | 2.40E-65  |
| Enie_28  | 1122 | LTR/Gypsy | LINE    | DF0004607.1 | Halyomorpha_halys-1_family-23 | 2.10E-10 | -      | -                                       | -        | G3DSA:3.30.70.270 | Reverse transcriptase/Diguanyl    | 2.80E-05  |
| Enie_3   | 4181 | LTR/Gypsy | LTR     | DF0002844.1 | Gypsy-30-I_DR                 | 8.10E-37 | P10394 | Retrovirus-related Pol polypeptide from | 1.11E-71 | PTHR24559         | TRANSPOSON TY3-I GAG-PO           | 6.00E-95  |
| Enie_30  | 1094 | LTR/Gypsy | DNA     | DF0002940.2 | Gypsy145-I_DR                 | 5.40E-23 | Q99315 | Transposon Ty3-G Gag-Pol polypeptide    | 1.73E-21 | PTHR24559         | TRANSPOSON TY3-I GAG-PO           | 8.00E-45  |
| Enie_5   | 3671 | LTR/Gypsy | LTR     | DF0001532.2 | ACCORD_I/Gypsy                | 2.20E-59 | P04323 | Retrovirus-related Pol polypeptide from | 6.79E-78 | PTHR24559         | TRANSPOSON TY3-I GAG-PO           | 2.50E-78  |
| Enie_9   | 3178 | Unknown   | LTR     | -           | -                             | -        | -      | -                                       | -        | cd00303           | retropepsin_like                  | 5.81E-17  |
| Epra_1   | 2507 | LTR/Gypsy | LTR     | DF0003150.2 | Gypsy172-I_Dr                 | 2.90E-27 | P04323 | Retrovirus-related Pol polypeptide from | 1.89E-78 | cd01647           | RT_LTR                            | 1.08E-71  |
| Epra_13  | 963  | Unknown   | LTR     | -           | -                             | -        | -      | -                                       | -        | cd00303           | retropepsin_like                  | 3.61E-11  |
| Epra_263 | 113  | Unknown   | unclear | -           | -                             | -        | -      | -                                       | -        | G3DSA:2.40.70.10  | Acid Proteases 1                  | 6.20E-07  |
| Epra_4   | 2184 | LTR/Gypsy | LTR     | DF0002669.2 | Gypsy-173_DR-I                | 1.90E-28 | Q7LHG5 | Transposon Ty3-I Gag-Pol polypeptide    | 3.83E-51 | PTHR24559         | TRANSPOSON TY3-I GAG-PO           | 1.40E-77  |
| Epra_5   | 2091 | Unknown   | Retro   | -           | -                             | -        | -      | -                                       | -        | G3DSA:3.10.10.10  | HIV Type 1 Reverse Transcriptase  | 2.80E-08  |
| Epra_52  | 544  | LTR/Gypsy | LTR     | -           | -                             | -        | Q99315 | Transposon Ty3-G Gag-Pol polypeptide    | 7.28E-14 | PF17921           | Integrase zinc binding domain     | 1.20E-16  |
| Epra_56  | 541  | Unknown   | LTR     | -           | -                             | -        | -      | -                                       | -        | PF13975           | gag-polypeptide putative aspartyl | 1.50E-07  |
| Epra_8   | 1434 | LTR/Gypsy | LINE    | DF0003989.2 | Gypsy108-I_Dr                 | 1.80E-19 | Q7LHG5 | Transposon Ty3-I Gag-Pol polypeptide    | 1.10E-28 | PTHR24559         | TRANSPOSON TY3-I GAG-PO           | 2.50E-53  |
| Epra_87  | 413  | LTR/Gypsy | LINE    | DF0003384.1 | Gypsy-170-I_DR                | 2.50E-20 | P04323 | Retrovirus-related Pol polypeptide from | 1.20E-14 | PTHR24559         | TRANSPOSON TY3-I GAG-PO           | 1.80E-18  |
| Epra_93  | 400  | LTR/Gypsy | LINE    | DF0004556.1 | Halyomorpha_halys-1_family-26 | 1.90E-16 | P04323 | Retrovirus-related Pol polypeptide from | 3.00E-21 | cd09274           | RNase_HL_RT_Ty3                   | 1.67E-38  |
| Eten_67  | 3355 | LTR/Gypsy | LTR     | DF0001608.2 | GTWIN_I/Gypsy                 | 1.10E-31 | P04323 | Retrovirus-related Pol polypeptide from | 7.90E-75 | cd01647           | RT_LTR                            | 1.41E-74  |
| Gnip_100 | 341  | LTR/Gypsy | LINE    | -           | -                             | -        | P20825 | Retrovirus-related Pol polypeptide from | 8.55E-15 | G3DSA:3.30.70.270 | Reverse transcriptase/Diguanyl    | 1.30E-24  |
| Gnip_102 | 337  | LTR/Gypsy | LINE    | DF0002844.1 | Gypsy-30-I_DR                 | 1.20E-15 | Q87040 | Pro-Pol polypeptide                     | 4.42E-07 | G3DSA:3.10.10.10  | HIV Type 1 Reverse Transcriptase  | 6.50E-15  |
| Gnip_11  | 1044 | LTR/Gypsy | unclear | DF0001544.2 | BLASTOPIA_I/Gypsy             | 1.60E-28 | Q7LHG5 | Transposon Ty3-I Gag-Pol polypeptide    | 2.24E-52 | cd01647           | RT_LTR                            | 8.89E-48  |
| Gnip_119 | 295  | Unknown   | LTR     | -           | -                             | -        | -      | -                                       | -        | G3DSA:3.30.420.10 | Ribonuclease H superfamily        | 7.70E-11  |
| Gnip_121 | 292  | Unknown   | LTR     | -           | -                             | -        | -      | -                                       | -        | PF17921           | Integrase zinc binding domain     | 1.80E-14  |
| Gnip_131 | 270  | LTR/Gypsy | LINE    | DF0001526.2 | ZAM_I/Gypsy                   | 7.10E-10 | P20825 | Retrovirus-related Pol polypeptide from | 2.69E-13 | G3DSA:3.30.70.270 | Reverse transcriptase/Diguanyl    | 1.10E-23  |
| Gnip_136 | 264  | LTR/Gypsy | Retro   | -           | -                             | -        | -      | -                                       | -        | PTHR24559         | TRANSPOSON TY3-I GAG-PO           | 2.00E-13  |
| Gnip_138 | 262  | Unknown   | Retro   | -           | -                             | -        | Q9P2P1 | Protein NYNRIN                          | 8.96E-06 | PF17921           | Integrase zinc binding domain     | 3.30E-16  |

|          |      |           |         |             |                               |          |          |                                         |          |                   |                                   |          |
|----------|------|-----------|---------|-------------|-------------------------------|----------|----------|-----------------------------------------|----------|-------------------|-----------------------------------|----------|
| Gnip_14  | 1000 | LTR/Gypsy | Retro   | DF0004584.1 | Halyomorpha_halys-1_family-18 | 5.40E-06 | P04323   | Retrovirus-related Pol polyprotein from | 3.10E-28 | PTHR24559         | TRANSPOSON TY3-I GAG-PO           | 7.30E-27 |
| Gnip_141 | 260  | LTR/Gypsy | LTR     | DF0001532.2 | ACCORD_I/Gypsy                | 2.70E-22 | clsdivsl | Retrovirus-related Pol polyprotein from | 7.15E-15 | cd01647           | RT_LTR                            | 4.50E-29 |
| Gnip_143 | 256  | Unknown   | LTR     | -           | -                             | -        | -        | -                                       | -        | G3DSA:3.30.420.10 | Ribonuclease H superfamily        | 8.40E-13 |
| Gnip_144 | 256  | LTR/Gypsy | LTR     | -           | -                             | -        | P31792   | Pol polyprotein (Fragment)              | 1.85E-10 | G3DSA:3.30.70.270 | Reverse transcriptase/Diguanyl    | 4.89E-20 |
| Gnip_149 | 240  | Unknown   | LTR     | -           | -                             | -        | -        | -                                       | -        | G3DSA:2.40.70.10  | Acid Proteases                    | 1.30E-07 |
| Gnip_157 | 224  | LTR/Gypsy | SINE    | -           | -                             | -        | -        | -                                       | -        | PTHR24559         | TRANSPOSON TY3-I GAG-PO           | 1.00E-13 |
| Gnip_16  | 959  | Unknown   | LINE    | -           | -                             | -        | -        | -                                       | -        | SSF57756          | Retrovirus zinc finger-like doma  | 1.53E-06 |
| Gnip_167 | 210  | LTR/Gypsy | LTR     | DF0001658.2 | Invader6_I/Gypsy              | 1.20E-11 | P03555   | Enzymatic polyprotein                   | 6.97E-07 | G3DSA:3.30.70.269 | Reverse transcriptase/Diguanyl    | 2.70E-10 |
| Gnip_168 | 208  | LTR/Gypsy | LTR     | DF0001532.2 | ACCORD_I/Gypsy                | 2.50E-12 | P03556   | Enzymatic polyprotein                   | 1.82E-13 | G3DSA:3.30.70.270 | Reverse transcriptase/Diguanyl    | 2.10E-18 |
| Gnip_17  | 954  | Unknown   | Retro   | -           | -                             | -        | -        | -                                       | -        | G3DSA:4.10.60.10  | Acid Proteases                    | 6.30E-08 |
| Gnip_173 | 200  | Unknown   | Retro   | -           | -                             | -        | -        | -                                       | -        | PF17921           | Integrase zinc binding domain     | 1.20E-14 |
| Gnip_175 | 200  | Unknown   | Retro   | -           | -                             | -        | -        | -                                       | -        | G3DSA:3.30.420.10 | Ribonuclease H superfamily        | 8.40E-12 |
| Gnip_18  | 951  | LTR/Gypsy | LINE    | -           | -                             | -        | vegetal  | Pro-Pol polyprotein                     | 1.99E-10 | G3DSA:3.30.70.270 | Reverse transcriptase/Diguanyl    | 9.00E-30 |
| Gnip_189 | 179  | Unknown   | SINE    | -           | -                             | -        | -        | -                                       | -        | PF17921           | Integrase zinc binding domain     | 1.50E-10 |
| Gnip_199 | 164  | Unknown   | LTR     | -           | -                             | -        | -        | -                                       | -        | PF13650           | Aspartyl protease                 | 6.20E-07 |
| Gnip_20  | 876  | LTR/Gypsy | LTR     | DF0002669.2 | Gypsy-173_DR-I                | 1.10E-23 | P10394   | Retrovirus-related Pol polyprotein from | 3.10E-34 | PF17919           | RNase H-like domain found in r    | 3.20E-20 |
| Gnip_22  | 853  | LTR/Gypsy | LINE    | DF0001532.2 | ACCORD_I/Gypsy                | 2.90E-32 | P04323   | Retrovirus-related Pol polyprotein from | 2.32E-43 | PTHR24559         | TRANSPOSON TY3-I GAG-PO           | 1.60E-35 |
| Gnip_27  | 763  | LTR/Gypsy | Retro   | DF0001658.2 | Invader6_I/Gypsy              | 6.00E-16 | P10394   | Retrovirus-related Pol polyprotein from | 3.28E-31 | G3DSA:3.30.70.270 | Reverse transcriptase/Diguanyl    | 3.00E-65 |
| Gnip_29  | 750  | Unknown   | LINE    | -           | -                             | -        | -        | -                                       | -        | G3DSA:3.30.420.10 | Ribonuclease H superfamily        | 9.00E-15 |
| Gnip_30  | 747  | Unknown   | LINE    | -           | -                             | -        | -        | -                                       | -        | G3DSA:3.30.420.10 | Ribonuclease H superfamily        | 6.90E-16 |
| Gnip_31  | 734  | Unknown   | LINE    | -           | -                             | -        | P03554   | Enzymatic polyprotein                   | 1.71E-12 | G3DSA:3.30.70.270 | Reverse transcriptase/Diguanyl    | 3.00E-31 |
| Gnip_32  | 731  | LTR/Gypsy | Retro   | DF0002669.2 | Gypsy-173_DR-I                | 8.50E-16 | P10394   | Retrovirus-related Pol polyprotein from | 8.03E-19 | G3DSA:3.30.70.270 | Reverse transcriptase/Diguanyl    | 3.40E-19 |
| Gnip_33  | 726  | LTR/Gypsy | LINE    | DF0001526.2 | ZAM_I/Gypsy                   | 2.50E-13 | P04323   | Retrovirus-related Pol polyprotein from | 1.29E-18 | cd01647           | RT_LTR                            | 5.31E-43 |
| Gnip_36  | 688  | Unknown   | LTR     | -           | -                             | -        | -        | -                                       | -        | PF13975           | gag-polyprotein putative aspartyl | 1.20E-06 |
| Gnip_45  | 572  | LTR/Gypsy | LINE    | DF0001544.2 | BLASTOPIA_I/Gypsy             | 1.90E-16 | P04323   | Retrovirus-related Pol polyprotein from | 5.40E-18 | cd09274           | RNase_HL_RT_Ty3                   | 1.97E-34 |
| Gnip_47  | 552  | LTR/Gypsy | LINE    | DF0003405.2 | Gypsy69-I_DR                  | 1.20E-07 | Q4R611   | Gypsy retrotransposon integrase-like p  | 1.39E-07 | PF17921           | Integrase zinc binding domain     | 1.10E-17 |
| Gnip_53  | 523  | LTR/Gypsy | LINE    | DF0002844.1 | Gypsy-30-I_DR                 | 4.30E-13 | P04323   | Retrovirus-related Pol polyprotein from | 5.20E-18 | cd01647           | RT_LTR                            | 2.75E-44 |
| Gnip_59  | 493  | Unknown   | LINE    | -           | -                             | -        | -        | -                                       | -        | PF17921           | Integrase zinc binding domain     | 8.90E-18 |
| Gnip_6   | 1579 | LTR/Gypsy | Retro   | DF0001526.2 | ZAM_I/Gypsy                   | 6.70E-11 | P0CT39   | Transposon Tf2-6 polyprotein            | 7.54E-36 | PTHR24559         | TRANSPOSON TY3-I GAG-PO           | 3.30E-74 |
| Gnip_60  | 486  | Unknown   | LINE    | -           | -                             | -        | Q09575   | Uncharacterized protein K02A2.6         | 2.06E-08 | G3DSA:3.30.420.10 | Ribonuclease H superfamily        | 2.10E-25 |
| Gnip_61  | 479  | Unknown   | LTR     | -           | -                             | -        | -        | -                                       | -        | SSF57756          | Retrovirus zinc finger-like doma  | 3.14E-06 |
| Gnip_62  | 479  | LTR/Gypsy | LTR     | DF0001532.2 | ACCORD_I/Gypsy                | 8.80E-07 | P04323   | Retrovirus-related Pol polyprotein from | 8.94E-27 | cd01647           | RT_LTR                            | 1.00E-32 |
| Gnip_63  | 476  | Unknown   | Retro   | -           | -                             | -        | -        | -                                       | -        | G3DSA:3.10.10.10  | HIV Type 1 Reverse Transcripta    | 3.80E-05 |
| Gnip_64  | 468  | LTR/Gypsy | LTR     | DF0002669.2 | Gypsy-173_DR-I                | 1.80E-07 | Q9UR07   | Transposon Tf2-11 polyprotein           | 1.84E-07 | G3DSA:3.30.70.270 | Reverse transcriptase/Diguanyl    | 9.70E-19 |
| Gnip_70  | 436  | LTR/Gypsy | LINE    | DF0001544.2 | BLASTOPIA_I/Gypsy             | 4.70E-07 | P04323   |                                         | 1.16E-09 | PF17919           | RNase H-like domain found in r    | 2.60E-25 |
| Gnip_73  | 424  | LTR/Gypsy | LINE    | DF0004631.1 | Halyomorpha_halys-1_family-28 | 2.10E-08 | P0CT43   | Transposon Tf2-8 polyprotein            | 9.75E-08 | PTHR24559         | TRANSPOSON TY3-I GAG-PO           | 1.70E-13 |
| Gnip_80  | 401  | LTR/Gypsy | LINE    | DF0001532.2 | ACCORD_I/Gypsy                | 4.40E-07 | P04323   | Retrovirus-related Pol polyprotein from | 6.82E-08 | PF17917           | RNase H-like domain found in r    | 5.40E-20 |
| Gnip_83  | 395  | Unknown   | LINE    | -           | -                             | -        | -        | -                                       | -        | PF13975           | gag-polyprotein putative aspartyl | 4.70E-08 |
| Gnip_84  | 395  | LTR/Gypsy | unclear | DF0001544.2 | BLASTOPIA_I/Gypsy             | 2.10E-08 | P20825   | Retrovirus-related Pol polyprotein from | 3.26E-09 | PF17919           | RNase H-like domain found in r    | 1.00E-18 |
| Gnip_86  | 380  | Unknown   | LTR     | -           | -                             | -        | -        | -                                       | -        | G3DSA:3.30.420.10 | Ribonuclease H superfamily        | 4.70E-22 |
| Gnip_97  | 344  | LTR/Gypsy | Retro   | DF0004565.1 | Halyomorpha_halys-1_family-27 | 3.60E-09 | P20825   | Retrovirus-related Pol polyprotein from | 9.04E-16 | cd09274           | RNase_HL_RT_Ty3                   | 1.56E-33 |
| Pgal_3   | 6853 | LTR/Gypsy | DNA     | DF0003144.1 | Gypsy133-I_DR                 | 1.40E-07 | -        | -                                       | -        | PTHR24559         | TRANSPOSON TY3-I GAG-PO           | 3.10E-40 |
| Pgal_42  | 788  | Unknown   | LINE    | -           | -                             | -        | -        | -                                       | -        | SSF57756          | Retrovirus zinc finger-like doma  | 5.93E-07 |
| Prel_10  | 1507 | LTR/Gypsy | LINE    | -           | -                             | -        | -        | -                                       | -        | G3DSA:3.30.420.10 | Ribonuclease H superfamily        | 3.90E-35 |
| Prel_3   | 2655 | LTR/Gypsy | LINE    | -           | -                             | -        | -        | -                                       | -        | PTHR24559         | TRANSPOSON TY3-I GAG-PO           | 2.00E-72 |
| Prel_4   | 2280 | LTR/Gypsy | LINE    | DF0003144.1 | Gypsy133-I_DR                 | 4.20E-09 | -        | -                                       | -        | G3DSA:3.30.70.270 | Reverse transcriptase/Diguanyl    | 1.70E-30 |
| Prel_8   | 1802 | Unknown   | LTR     | -           | -                             | -        | -        | -                                       | -        | cd00303           | retropepsin_like                  | 2.21E-10 |
| Tequ_3   | 4426 | LINE      | LTR     | -           | -                             | -        | Q03274   | Retrovirus-related Pol polyprotein from | -        | cd01650           | RT_nLTR_like                      | 4.18E-39 |

|         |      |           |     |             |                |          |        |                                         |          |           |                         |           |
|---------|------|-----------|-----|-------------|----------------|----------|--------|-----------------------------------------|----------|-----------|-------------------------|-----------|
| api_157 | 7204 | LTR/Gypsy | LTR | DF0002844.1 | Gypsy-30-I_DR  | 7.20E-37 | P10394 | Retrovirus-related                      | 6.07E-79 | PTHR24559 | TRANSPOSON TY3-I GAG-PO | 7.40E-122 |
| api_165 | 6611 | LTR/Gypsy | LTR | DF0002669.2 | Gypsy-173_DR-I | 1.00E-18 | P04323 | Retrovirus-related Pol polyprotein from | 1.53E-79 | PTHR24559 | TRANSPOSON TY3-I GAG-PO | 1.20E-87  |
| api_181 | 4980 | LTR/Gypsy | LTR | DF0003989.2 | Gypsy108-I_Dr  | 8.20E-28 | P04323 | Retrovirus-related Pol polyprotein from | 4.02E-74 | cd01647   | RT_LTR                  | 1.90E-69  |
| api_194 | 4356 | LINE      | LTR | -           | -              | -        | P16423 | Retrovirus-related Pol polyprotein from | 1.11E-14 | cd01650   | RT_nLTR_like            | 7.90E-35  |
| api_207 | 3684 | Unknown   | LTR | -           | -              | -        | -      | -                                       | -        | cd00303   | retropepsin_like        | 1.09E-16  |
| api_213 | 3430 | LTR/Gypsy | LTR | DF0002844.1 | Gypsy-30-I_DR  | 6.70E-24 | P10394 | Retrovirus-related Pol polyprotein from | 8.53E-48 | PTHR24559 | TRANSPOSON TY3-I GAG-PO | 1.30E-15  |
| api_231 | 2659 | LTR/Gypsy | DNA | DF0002669.2 | Gypsy-173_DR-I | 3.00E-12 | Q7LHG5 | Transposon Ty3-I Gag-Pol polyprotein    | 7.81E-37 | PTHR24559 | TRANSPOSON TY3-I GAG-PO | 3.40E-43  |
| api_254 | 1885 | LTR/Gypsy | DNA | DF0003405.2 | Gypsy69-I_DR   | 2.50E-24 | P0CT43 | Transposon Tf2-8 polyprotein            | 6.56E-46 | PTHR24559 | TRANSPOSON TY3-I GAG-PO | 2.30E-42  |
| api_318 | 809  | Unknown   | DNA | -           | -              | -        | -      | -                                       | -        | PTHR46148 | CHROMO DOMAIN-CONTAINI  | 1.90E-17  |
